# Supplementary material for: A hydrophilic monodisperse conjugated starburst macromolecule with multidimensional topology as electron transport/injection layer for organic electronics
Source: Royal Society of Chemistry journal article supplement (doi:10.1039/c3py01477k), 2014-01-01
Supplement: c3py01477k.pdf [file c3py01477k.pdf]

## Supplementary Information for

# A Hydrophilic Monodisperse Conjugated Starburst Macromolecule with Multidimensional Topology as Electron Transport/Injection Layer for Organic Electronics

Wei-Dong Xu, Wen-Yong Lai\*, Xiao-Yun Teng, Qi Hu, Xin-Wen Zhang, and Wei Huang\*  
Key Laboratory for Organic Electronics & Information Displays (KLOEID), Institute of Advanced  
Materials (IAM), Nanjing University of Posts & Telecommunications, 9 Wenyuan Road, Nanjing  
210023, China

E-mail: iamwylai@njupt.edu.cn; iamwhuang@njupt.edu.cn

### 1.1 Optical properties of TrOH in various solvents.

**Table S1.** Optical properties of TrOH in various solvents.

| Compound | $\lambda_{(\text{abs})}^a$ (nm) |      |     |      |      |      | $\lambda_{(\text{em})}^b$ (nm) |             |             |             |             |             |
|----------|---------------------------------|------|-----|------|------|------|--------------------------------|-------------|-------------|-------------|-------------|-------------|
|          | THF                             | DMSO | DMF | EtOH | MeOH | Film | THF                            | DMSO        | DMF         | EtOH        | MeOH        | Film        |
| TrOH     | 364                             | 368  | 365 | 360  | 359  | 368  | 404,<br>427                    | 409,<br>431 | 407,<br>429 | 402,<br>424 | 402,<br>424 | 414,<br>434 |

<sup>a</sup> Absorption peak. <sup>b</sup> Emission peak.

### 1.2 Device performance with TrOH/Al as cathode

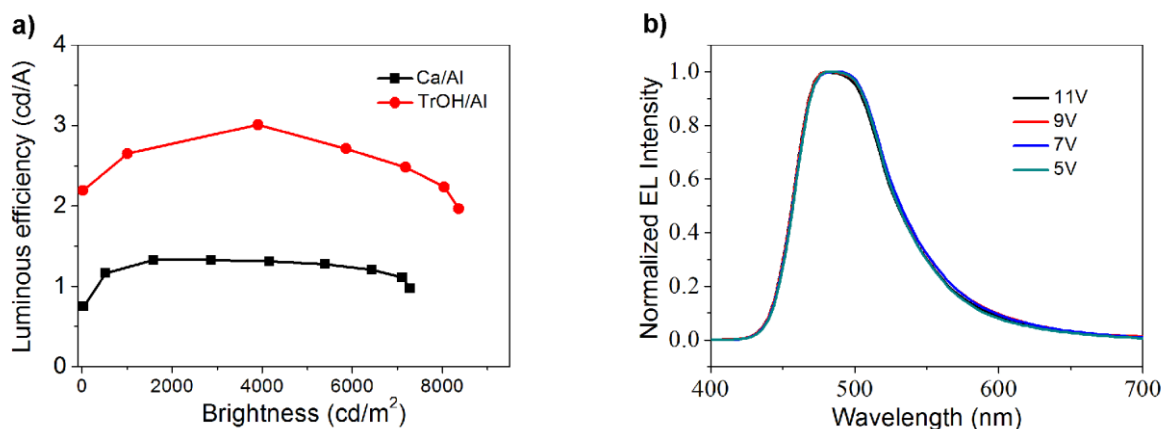

**Fig. S1** a) Current efficiency vs. brightness; b) EL spectra of the devices with TrOH/Al at varying

driving voltages.

### 1.3 Device performance with TrOH/Ag as cathode

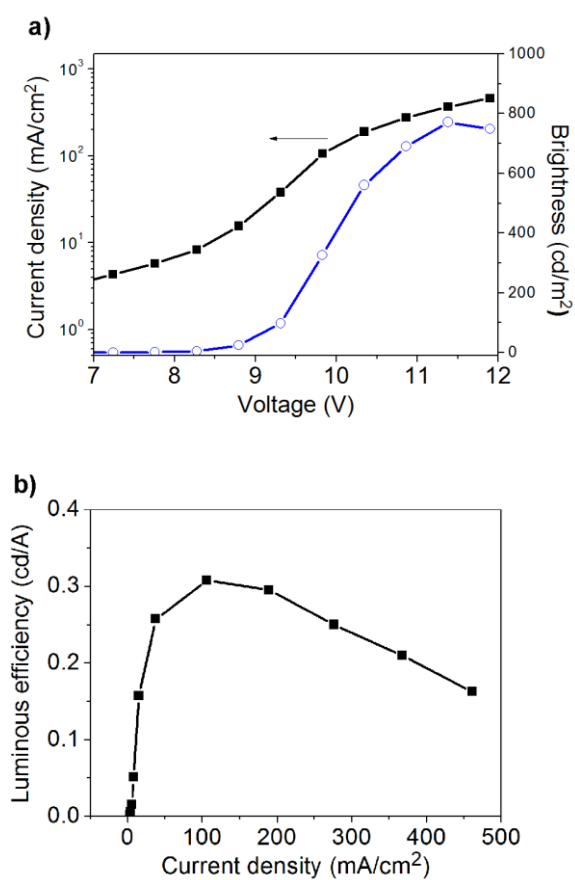

**Fig. S2** Device performance of ITO/PEDOT:PSS/F3Py/TrOH/Ag: a) Current density and brightness vs. voltage; b) luminous efficiency vs. current density.

**Table S2** Device performance of ITO/PEDOT:PSS/F3Py/TrOH/Ag

| Cathode | $V_{\text{on}}^{\text{a}}$<br>(V) | Luminance<br>(max)<br>(cd m <sup>-2</sup> ) | $LE_{\text{max}}$<br>(cd A <sup>-1</sup> ) |
|---------|-----------------------------------|---------------------------------------------|--------------------------------------------|
| TrOH/Ag | 7.7                               | 771                                         | 0.31                                       |

<sup>a</sup>Turn-on voltage at a brightness of 1 cd m<sup>-2</sup>

### 1.4 Device performance of TrOH as ETL in comparison with those of its polymer counterpart PFN-OH with varying batches and small-molecule counterpart DIFN-OH

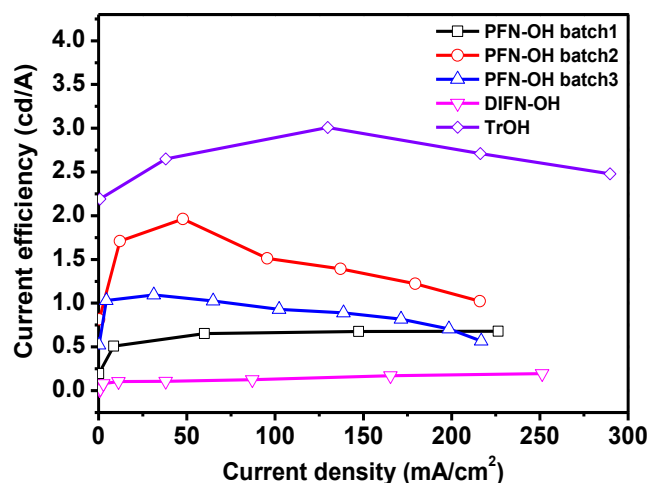

Fig. S3 Device performance with configuration of ITO/PEDOT:PSS/F3Py/ PFN-OH (from different batch), or DIFN-OH, or TrOH/Al

Table S3. Device performance with configuration of ITO/PEDOT:PSS/F3Py/ PFN-OH (from different batch), or DIFN-OH, or TrOH/Al

|                   | Mn<br>(g/mol) | Mw<br>(g/mol) | PDI  | V <sub>on</sub><br>(V) | LE <sub>max</sub><br>(cd/A) | L <sub>max</sub><br>(cd/m <sup>2</sup> ) |
|-------------------|---------------|---------------|------|------------------------|-----------------------------|------------------------------------------|
| PFN-OH<br>Batch 1 | 17900         | 63300         | 3.54 | 3.1                    | 0.68<br>(at 5.2 V)          | 2636<br>(at 8.3 V)                       |
| PFN-OH<br>Batch 2 | 18000         | 32300         | 1.80 | 3.1                    | 1.96<br>(at 5.2 V)          | 2208<br>(at 7.2 V)                       |
| PFN-OH<br>Batch 3 | 14400         | 44800         | 3.11 | 3.2                    | 1.10<br>(at 5.2 V)          | 1399<br>(at 7.2 V)                       |
| DIFN-OH           | 1078.8        | 1079.5        | 1.00 | 3.8                    | 0.33<br>(at 7.7V)           | 2210<br>(at 8.3 V)                       |
| TrOH              | 3908.8        | 3911.6        | 1.00 | 3.6                    | 3.01<br>(at 6.2 V)          | 8360<br>(at 7.2 V)                       |

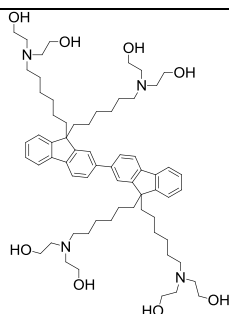

Fig. S4 Structure of DIFN-OH

## 1.5 Film morphology

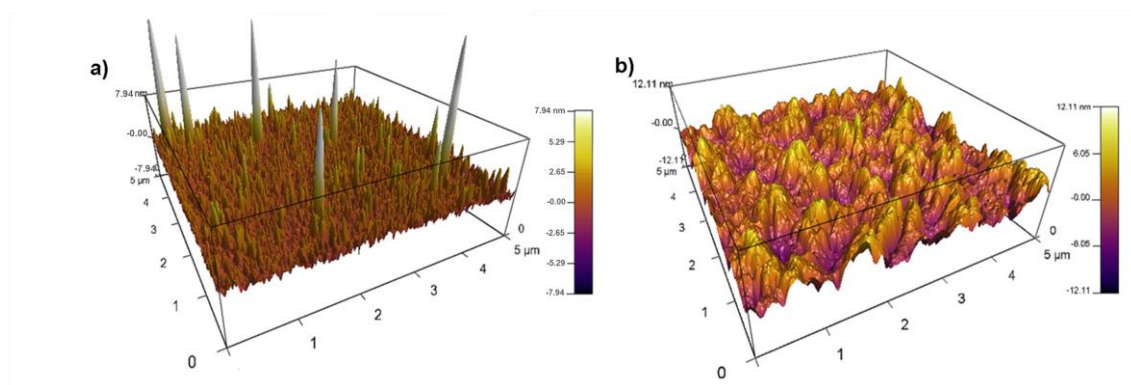

**Fig. S5** 3D atomic force microscopy (AFM) image of (a)PFN-OH atop F3Py/PEDOT:PSS/ITO (b)TrOH atop F3Py/PEDOT:PSS/ITO. The size of the image is  $5\ \mu\text{m} \times 5\ \mu\text{m}$ .

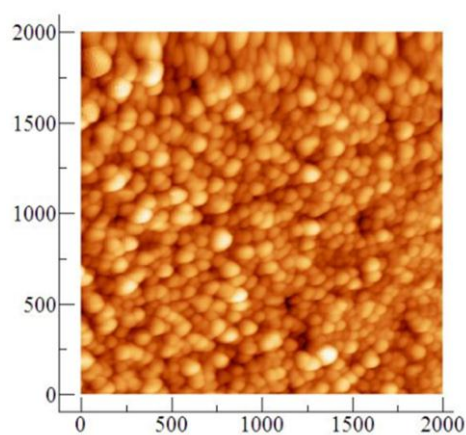

**Fig. S6** Atomic force microscopy (AFM) image image TrOH atop ITO. The size of the image is  $2\ \mu\text{m} \times 2\ \mu\text{m}$ .

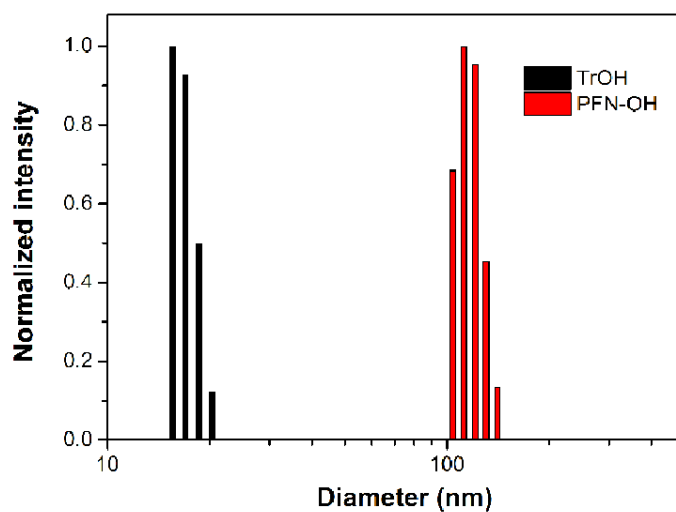

**Fig. S7** Dynamic light scattering (DLS) of PFN-OH (0.2 mg/mL) and TrOH (3 mg/mL) in ethanol  
**1.5 NMR and Mass spectra**

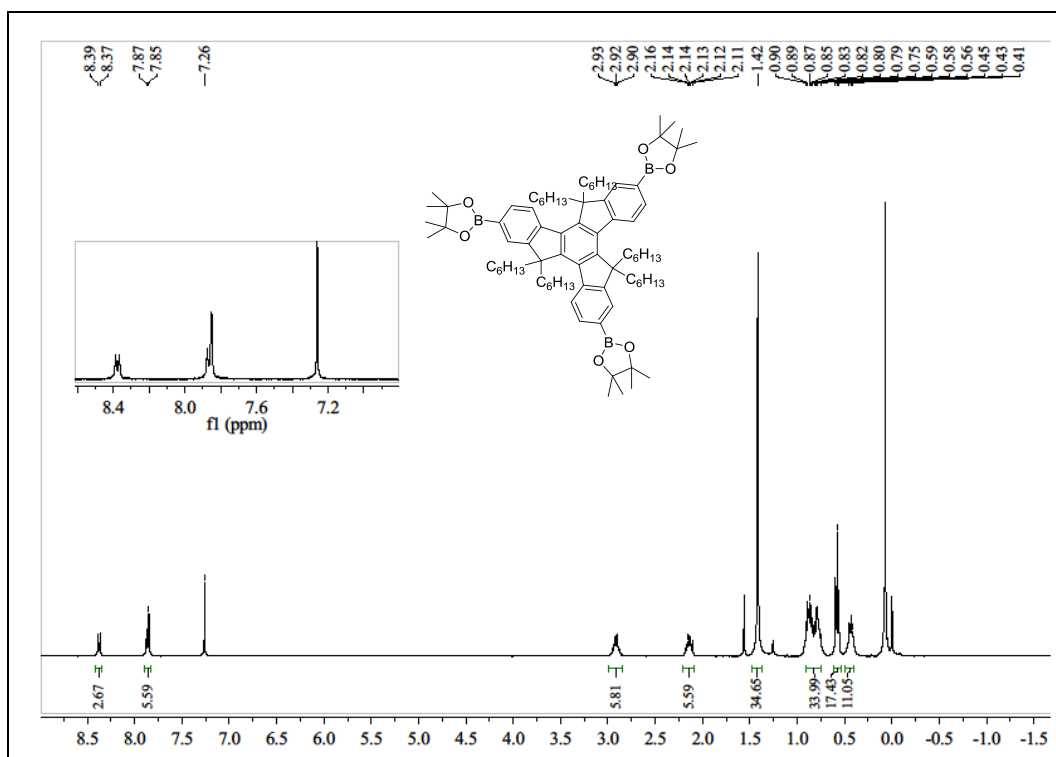

**Fig. S8**  $^1\text{H}$  NMR spectra of 6.

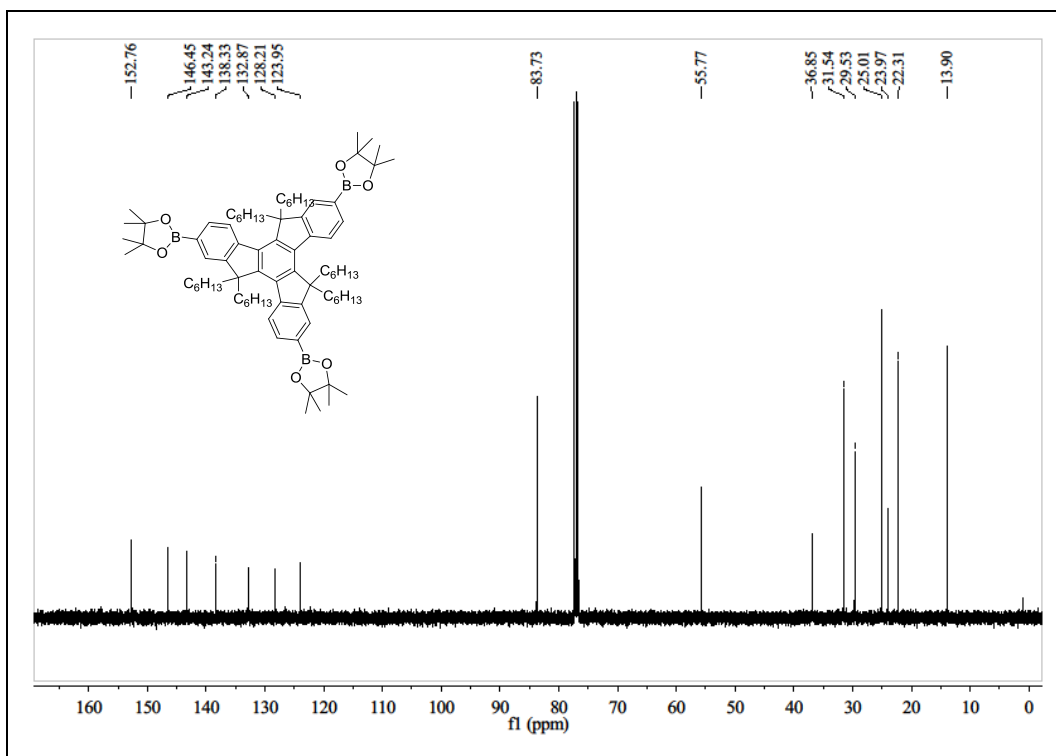

**Fig. S9**  $^{13}\text{C}$  NMR spectra of 6.

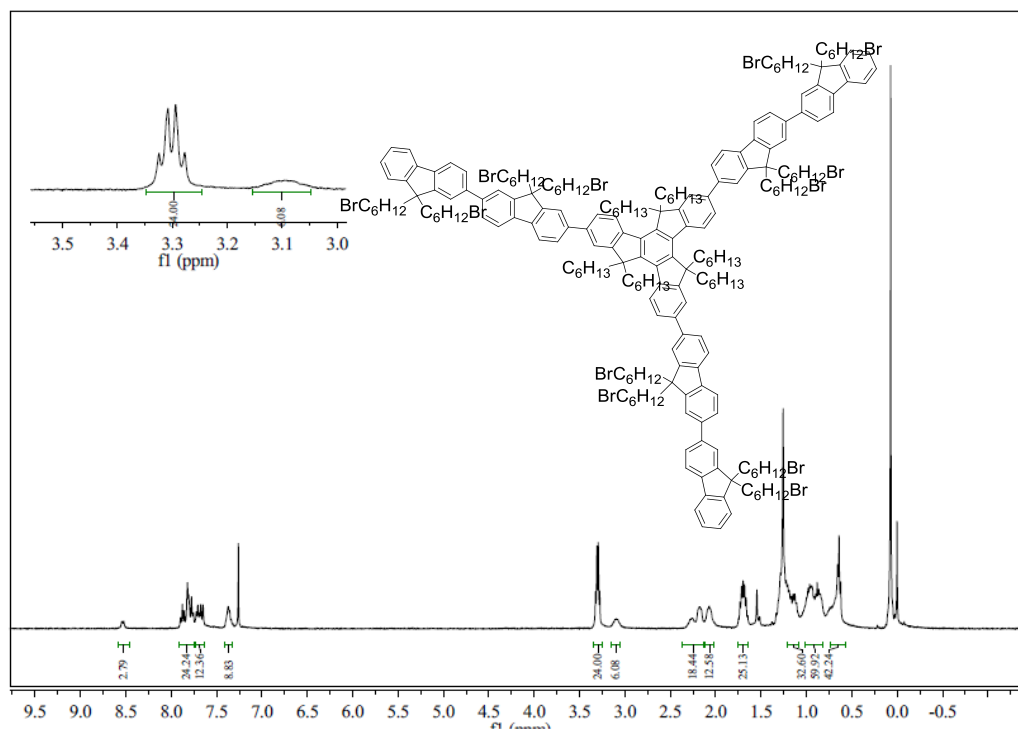

Fig. S10  $^1\text{H}$  NMR spectra of PreTF2.

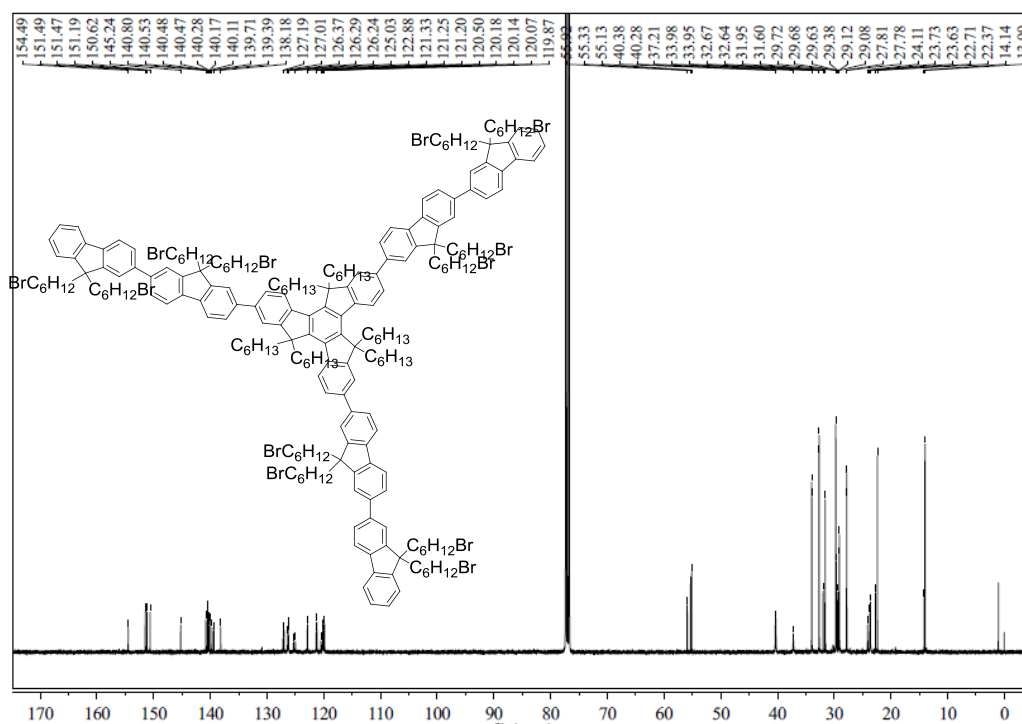

Fig. S11  $^{13}\text{C}$  NMR spectra of PreTF2.

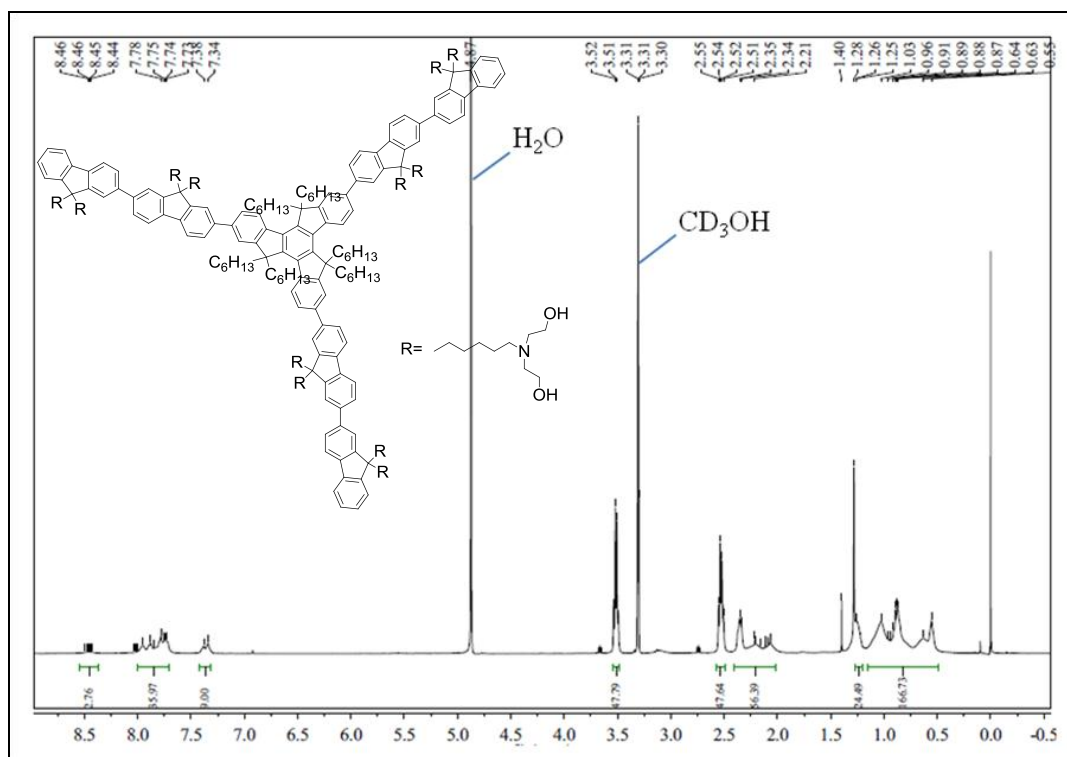

**Fig. S12**  $^1\text{H}$  NMR spectra of **TrOH**

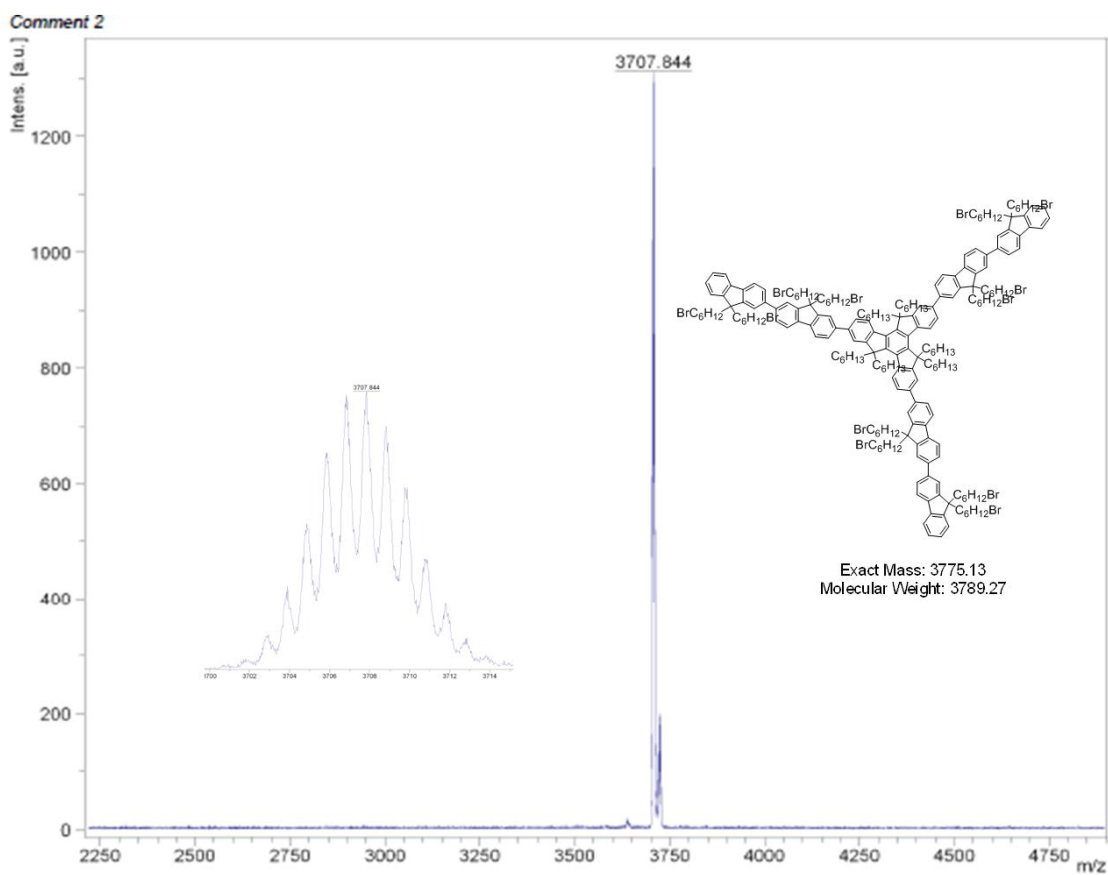

**Fig. S13** MALDI-TOF-MS spectra of **PreTF2**.
